# Supplementary material for: On the nature of noble gas – metal bond in silver aggregates
Source: Royal Society of Chemistry journal article supplement (doi:10.1039/d3cp03416j), 2023-01-01
Supplement: d3cp03416j1.pdf [file d3cp03416j1.pdf]

## Supporting Information

### On the nature of Noble gas – Metal bond in Silver aggregates

Celian Courtney <sup>a</sup>, Bruno Siberchicot <sup>a,b\*</sup>

*a* : CEA, DAM, DIF, F-91297, Arpaion CEDEX, France

*b* : CEA, Laboratoire Matière en Conditions Extrêmes, Université Paris-Saclay, F-91680, Bruyères-le-Châtel, France

#### Corresponding author

Email: [bruno.siberchicot@cea.fr](mailto:bruno.siberchicot@cea.fr) ; +33 1 69 26 73 27

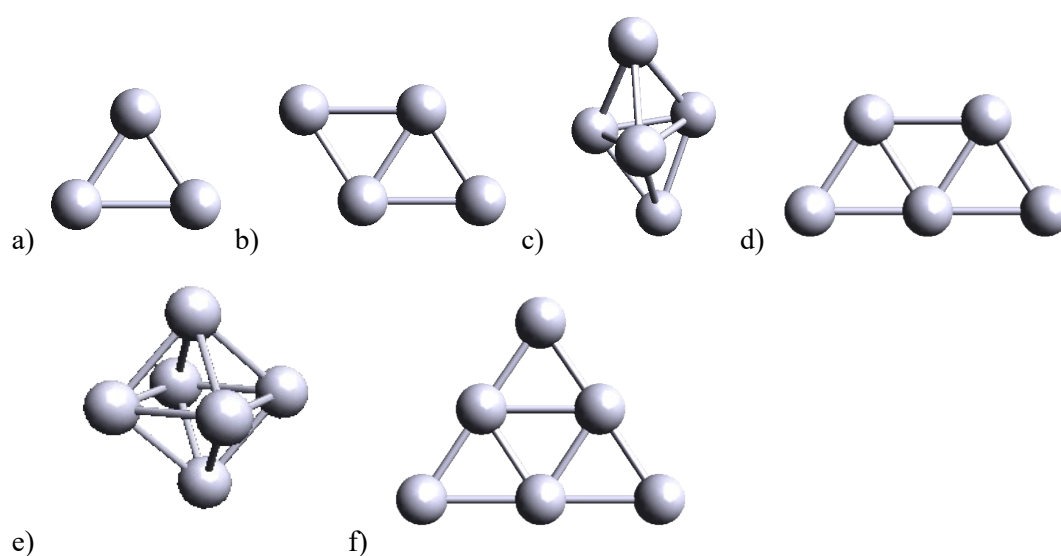

Figure S1 : Structures of the Ag<sub>n</sub> aggregates: a) Ag<sub>3</sub> b) Ag<sub>4</sub> c) Ag<sub>5</sub> 3D, d) Ag<sub>5</sub> 2D, e) Ag<sub>6</sub> 3D f) Ag<sub>6</sub> 2D

Table S1 : Atoms-in-Molecules BCP descriptors of Ag<sub>147</sub>

| Ag147     | Laplacian | Density at BCP | Gb(rc)   | Vb(rc)    | Hb(rc)   | R        | Theta    |
|-----------|-----------|----------------|----------|-----------|----------|----------|----------|
| Xe Vertex | 3,61E-02  | 1,62E-02       | 9,01E-03 | -8,99E-03 | 2,14E-05 | 4,52E-03 | 8,97E+01 |
| Xe Edge   | 1,50E-02  | 6,81E-03       | 3,20E-03 | -2,65E-03 | 5,45E-04 | 1,95E-03 | 7,38E+01 |
| Xe FCC    | 4,98E-03  | 2,64E-03       | 9,75E-04 | -7,04E-04 | 2,71E-04 | 6,79E-04 | 6,65E+01 |
| Xe HCP    | 5,51E-03  | 2,66E-03       | 1,07E-03 | -7,52E-04 | 3,13E-04 | 7,57E-04 | 6,56E+01 |
| Xe Facet  | 1,12E-02  | 5,21E-03       | 2,32E-03 | -1,83E-03 | 4,86E-04 | 1,49E-03 | 7,09E+01 |

Table S2 : Atoms-in-Molecules BCP descriptors of Ag<sub>55</sub>

| Ag55      | Laplacian | Density at BCP | Gb(rc)   | Vb(rc)    | Hb(rc)    | R        | Theta     |
|-----------|-----------|----------------|----------|-----------|-----------|----------|-----------|
| He Vertex | 8,02E-03  | 2,18E-03       | 1,44E-03 | -8,79E-04 | 5,63E-04  | 0,00115  | 60,67736  |
| He Edge   | 6,66E-03  | 1,83E-03       | 1,19E-03 | -7,12E-04 | 4,76E-04  | 9,59E-04 | 60,22016  |
| He FCC    | 4,02E-03  | 1,34E-03       | 7,17E-04 | -4,29E-04 | 2,88E-04  | 5,79E-04 | 60,16123  |
| He HCP    | 3,59E-03  | 1,22E-03       | 6,38E-04 | -3,79E-04 | 2,59E-04  | 5,18E-04 | 59,99176  |
| Ne Vertex | 1,47E-02  | 3,94E-03       | 2,73E-03 | -1,79E-03 | 9,43E-04  | 0,00207  | 62,83825  |
| Ne Edge   | 1,15E-02  | 3,19E-03       | 2,12E-03 | -1,36E-03 | 7,60E-04  | 0,00163  | 62,1394   |
| Ne FCC    | 4,70E-03  | 1,65E-03       | 8,49E-04 | -5,24E-04 | 3,26E-04  | 6,72E-04 | 61,01057  |
| Ne HCP    | 6,50E-03  | 2,29E-03       | 1,20E-03 | -7,70E-04 | 4,27E-04  | 9,18E-04 | 62,25243  |
| Ar Vertex | 1,46E-02  | 5,01E-03       | 2,85E-03 | -2,06E-03 | 7,95E-04  | 0,00199  | 66,44835  |
| Ar Edge   | 9,79E-03  | 3,36E-03       | 1,85E-03 | -1,25E-03 | 5,99E-04  | 0,00136  | 63,90367  |
| Ar FCC    | 4,03E-03  | 1,73E-03       | 7,43E-04 | -4,79E-04 | 2,64E-04  | 5,69E-04 | 62,32004  |
| Ar HCP    | 4,29E-03  | 1,85E-03       | 7,95E-04 | -5,18E-04 | 2,77E-04  | 6,04E-04 | 62,64334  |
| Kr Vertex | 3,03E-02  | 1,11E-02       | 6,64E-03 | -5,70E-03 | 9,39E-04  | 0,0039   | 76,07439  |
| Kr Edge   | 2,52E-02  | 9,25E-03       | 5,37E-03 | -4,44E-03 | 9,30E-04  | 0,00328  | 73,55675  |
| Kr FCC    | 6,20E-03  | 2,92E-03       | 1,20E-03 | -8,59E-04 | 3,45E-04  | 8,48E-04 | 65,97937  |
| Kr HCP    | 4,20E-03  | 1,98E-03       | 7,90E-04 | -5,29E-04 | 2,60E-04  | 5,86E-04 | 63,62225  |
| Xe Vertex | 4,22E-02  | 1,89E-02       | 1,09E-02 | -1,12E-02 | -3,34E-04 | 0,00529  | 93,62002  |
| Xe Edge   | 2,31E-02  | 9,95E-03       | 5,17E-03 | -4,57E-03 | 6,03E-04  | 0,00295  | 78,19718  |
| Xe FCC    | 2,18E-02  | 6,70E-03       | 4,32E-03 | -3,18E-03 | 1,13E-03  | 0,00295  | 67,42388  |
| Xe HCP    | 5,11E-03  | 2,66E-03       | 9,98E-04 | -7,19E-04 | 2,79E-04  | 6,97E-04 | 66,38897  |
| Rn Vertex | 4,40E-02  | 2,28E-02       | 1,26E-02 | -1,42E-02 | -1,60E-03 | 0,00573  | 106,19195 |
| Rn Edge   | 3,26E-02  | 1,58E-02       | 8,29E-03 | -8,43E-03 | -1,40E-04 | 0,00408  | 91,96498  |
| Rn FCC    | 9,82E-03  | 5,49E-03       | 2,13E-03 | -1,80E-03 | 3,28E-04  | 0,00127  | 75,0298   |
| Rn HCP    | 1,06E-02  | 5,72E-03       | 2,29E-03 | -1,93E-03 | 3,58E-04  | 0,00137  | 74,87842  |

Table S3 : Atoms-in-Molecules BCP descriptors of Ag<sub>13</sub>

| Ag13      | Laplacian | Density at BCP | Gb(rc)   | Vb(rc)    | Hb(rc)    | R        | Theta     |
|-----------|-----------|----------------|----------|-----------|-----------|----------|-----------|
| He Hollow | 3,14E-03  | 1,12E-03       | 5,58E-04 | -3,31E-04 | 2,27E-04  | 4,53E-04 | 59,95895  |
| He On-Top | 5,78E-03  | 1,65E-03       | 1,03E-03 | -6,14E-04 | 4,16E-04  | 8,33E-04 | 60,09649  |
| Ne Hollow | 5,83E-03  | 2,17E-03       | 1,08E-03 | -6,95E-04 | 3,81E-04  | 8,23E-04 | 62,37409  |
| Ne On-Top | 1,38E-02  | 3,80E-03       | 2,57E-03 | -1,68E-03 | 8,84E-04  | 0,00194  | 62,85834  |
| Ar Hollow | 6,58E-03  | 2,96E-03       | 1,27E-03 | -8,99E-04 | 3,73E-04  | 9,03E-04 | 65,5987   |
| Ar On-Top | 2,45E-02  | 8,08E-03       | 5,02E-03 | -3,91E-03 | 1,11E-03  | 0,00326  | 70,11823  |
| Kr Hollow | 2,50E-03  | 1,23E-03       | 4,57E-04 | -2,89E-04 | 1,68E-04  | 3,55E-04 | 61,76728  |
| Kr On-Top | 3,48E-02  | 1,28E-02       | 7,81E-03 | -6,92E-03 | 8,89E-04  | 0,00444  | 78,45002  |
| Xe Hollow | 3,92E-03  | 2,20E-03       | 7,60E-04 | -5,40E-04 | 2,20E-04  | 5,37E-04 | 65,8387   |
| Xe On-Top | 5,71E-02  | 2,57E-02       | 1,59E-02 | -1,76E-02 | -1,67E-03 | 0,00733  | 103,153   |
| Rn Hollow | 1,28E-02  | 6,97E-03       | 2,86E-03 | -2,53E-03 | 3,36E-04  | 0,00163  | 78,12507  |
| Rn On-Top | 5,67E-02  | 2,85E-02       | 1,71E-02 | -2,00E-02 | -2,91E-03 | 0,00766  | 112,32229 |

Table S4 : Atoms-in-Molecules BCP descriptors of Ag<sub>1</sub>

| Ag1 | Laplacian | Density at BCP | Gb(rc)   | Vb(rc)    | Hb(rc)    | R        | Theta     |
|-----|-----------|----------------|----------|-----------|-----------|----------|-----------|
| He  | 3,53E-03  | 1,13E-03       | 6,24E-04 | -3,65E-04 | 2,59E-04  | 5,12E-04 | 59,59153  |
| Ne  |           |                |          |           |           |          |           |
| Ar  | 1,16E-02  | 4,47E-03       | 2,28E-03 | -1,66E-03 | 6,18E-04  | 0,00158  | 66,90266  |
| Kr  | 1,32E-02  | 5,85E-03       | 2,75E-03 | -2,19E-03 | 5,55E-04  | 0,00174  | 71,41932  |
| Xe  | 2,49E-02  | 1,20E-02       | 5,96E-03 | -5,69E-03 | 2,69E-04  | 0,00312  | 85,0594   |
| Rn  | 3,34E-02  | 1,84E-02       | 9,25E-03 | -1,02E-02 | -8,99E-04 | 0,00427  | 102,14916 |

Table S5 : Atoms-in-Molecules BCP descriptors of Ag<sub>2</sub>

| Ag2 | Laplacian | Density at BCP | Gb(rc)  | Vb(rc)    | Hb(rc)   | R       | Theta     |
|-----|-----------|----------------|---------|-----------|----------|---------|-----------|
| He  | 0,00809   | 0,00218        | 0,00145 | -8,85E-04 | 5,69E-04 | 0,00116 | 60,63782  |
| Ne  | 0,0166    | 0,00428        | 0,00309 | -0,00203  | 0,00106  | 0,00233 | 62,95354  |
| Ar  | 0,0371    | 0,0116         | 0,00789 | -0,00651  | 0,00138  | 0,00484 | 73,37236  |
| Kr  | 0,0507    | 0,0186         | 0,0122  | -0,01172  | 4,76E-04 | 0,00636 | 85,70529  |
| Xe  | 0,0694    | 0,0308         | 0,02026 | -0,02316  | -0,00291 | 0,00915 | 108,52011 |
| Rn  | 0,0545    | 0,0284         | 0,01667 | -0,01972  | -0,00305 | 0,00746 | 114,10964 |

Table S6 : Atoms-in-Molecules BCP descriptors of Ag<sub>3</sub>

| Ag3 | Laplacian | Density at BCP | Gb(rc)   | Vb(rc)    | Hb(rc)    | R        | Theta     |
|-----|-----------|----------------|----------|-----------|-----------|----------|-----------|
| He  | 6,73E-03  | 1,76E-03       | 1,20E-03 | -7,08E-04 | 4,87E-04  | 9,72E-04 | 59,9248   |
| Ne  | 1,28E-02  | 3,47E-03       | 2,36E-03 | -1,52E-03 | 8,38E-04  | 0,00181  | 62,34805  |
| Ar  | 4,59E-02  | 1,42E-02       | 1,00E-02 | -8,61E-03 | 1,43E-03  | 0,00591  | 75,96571  |
| Kr  | 7,90E-02  | 2,79E-02       | 2,05E-02 | -2,13E-02 | -7,86E-04 | 0,00991  | 94,54897  |
| Xe  | 7,78E-02  | 3,51E-02       | 2,38E-02 | -2,81E-02 | -4,32E-03 | 0,01064  | 113,95433 |
| Rn  | 6,62E-02  | 3,42E-02       | 2,14E-02 | -2,62E-02 | -4,83E-03 | 0,00958  | 120,26883 |

Table S7: Atoms-in-Molecules BCP descriptors of Ag<sub>4</sub>

| Ag4 | Laplacian | Density at BCP | Gb(rc)  | Vb(rc)   | Hb(rc)   | R       | Theta     |
|-----|-----------|----------------|---------|----------|----------|---------|-----------|
| He  | 0,0249    | 0,00582        | 0,00469 | -0,00316 | 0,00153  | 0,00347 | 63,75881  |
| Ne  | 0,0358    | 0,00775        | 0,00684 | -0,00473 | 0,00211  | 0,00495 | 64,73591  |
| Ar  | 0,0717    | 0,0214         | 0,01669 | -0,01545 | 0,00124  | 0,00905 | 82,13007  |
| Kr  | 0,101     | 0,034          | 0,02708 | -0,02891 | -0,00183 | 0,01276 | 98,24245  |
| Xe  | 0,0869    | 0,0373         | 0,02644 | -0,03115 | -0,00471 | 0,01184 | 113,46056 |
| Rn  | 0,0841    | 0,0408         | 0,0279  | -0,03478 | -0,00688 | 0,01256 | 123,18505 |

Table S8: Atoms-in-Molecules BCP descriptors of Ag<sub>6</sub> Octahedron

| Ag6 | Laplacian | Density at BCP | Gb(rc)   | Vb(rc)    | Hb(rc)    | R        | Theta     |
|-----|-----------|----------------|----------|-----------|-----------|----------|-----------|
| He  | 4,69E-03  | 1,40E-03       | 8,32E-04 | -4,91E-04 | 3,41E-04  | 6,78E-04 | 59,83483  |
| Ne  | 2,11E-02  | 7,36E-03       | 4,32E-03 | -3,36E-03 | 9,57E-04  | 0,0028   | 70,04466  |
| Ar  | 3,89E-02  | 1,48E-02       | 9,03E-03 | -8,34E-03 | 6,85E-04  | 0,0049   | 81,97588  |
| Kr  | 5,63E-02  | 2,61E-02       | 1,60E-02 | -1,79E-02 | -1,92E-03 | 0,00729  | 105,25263 |
| Xe  | 5,04E-02  | 2,32E-02       | 1,38E-02 | -1,51E-02 | -1,23E-03 | 0,00642  | 101,0057  |
| Rn  | 5,03E-02  | 2,32E-02       | 1,38E-02 | -1,50E-02 | -1,22E-03 | 0,00641  | 100,98822 |

Table S9 : Values of R<sub>0</sub> of the power law fit for each noble gas

| Gas | R0     | R-square |
|-----|--------|----------|
| He  | 1,4382 | 0,948    |
| Ne  | 1,5272 | 0,920    |
| Ar  | 1,7003 | 0,979    |
| Kr  | 1,7581 | 0,960    |
| Xe  | 1,8368 | 0,971    |
| Rn  | 1,8536 | 0,943    |

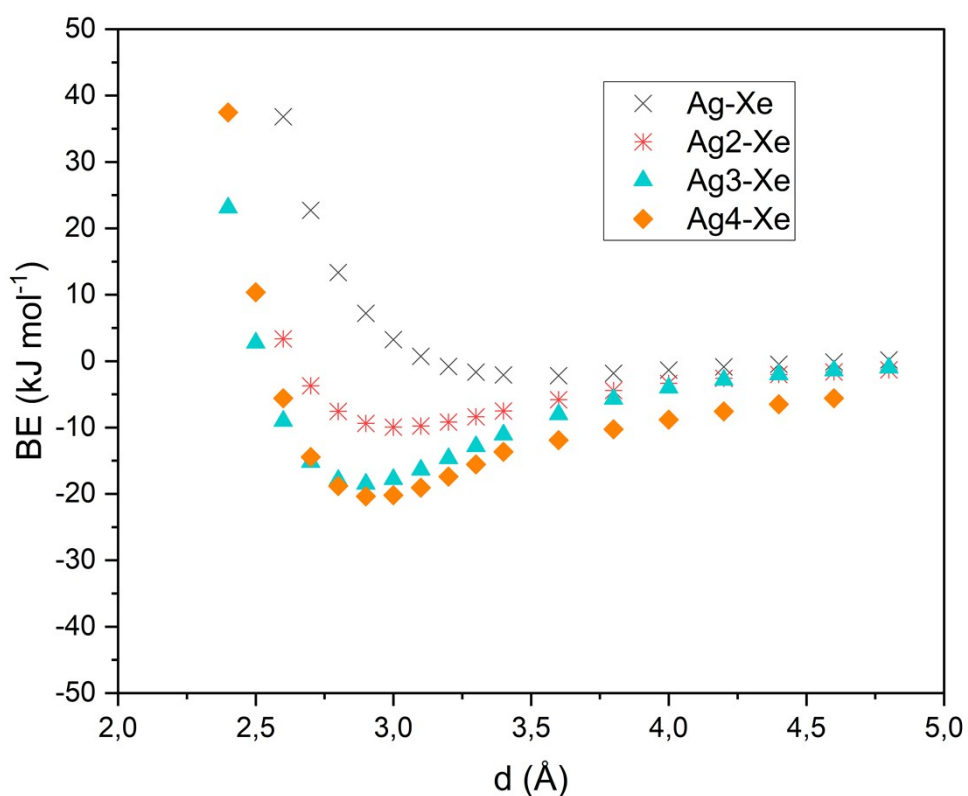

Figure S2: Binding energy curves of Xe to Ag<sub>1</sub>, Ag<sub>2</sub>, Ag<sub>3</sub> and Ag<sub>4</sub>

Table S10: Binding energies and bond lengths of Xe with Ag<sub>1</sub>, Ag<sub>2</sub>, Ag<sub>3</sub> and Ag<sub>4</sub>

| System size (Ag <sub>n</sub> ) | Binding Energy (kJ mol <sup>-1</sup> ) | Bond length (Å) |
|--------------------------------|----------------------------------------|-----------------|
| Ag <sub>1</sub>                | -2.18                                  | 3.6             |
| Ag <sub>2</sub>                | -9.96                                  | 3.0             |
| Ag <sub>3</sub>                | -18.49                                 | 2.9             |
| Ag <sub>4</sub>                | -20.37                                 | 2.9             |

Table S11: Relative energies and bond length of Ag<sub>55</sub>-Xe for each inequivalent adsorption site.

| Adsorption site | Relative energy (kJ mol <sup>-1</sup> ) | Bond length (Å) |
|-----------------|-----------------------------------------|-----------------|
| Vertex S5       | 0 ( <i>reference</i> )                  | 3.3             |
| Edge S6         | +3.16                                   | 3.6             |
| Hollow FCC      | +6.98                                   | 3.6             |
| Hollow HCP      | +4.18                                   | 4.1             |
